## Laboratory Report

### Normal Hemoglobin-Oxygen Affinity

Richard D. Yoder, M.D.,\* Andrew Seidenfeld, B.M.,† Kunio Suwa, M.D.‡

Hemoglobin-oxygen affinity is known to vary in a number of disease states. The authors measured the continuous affinity of blood from healthy subjects and, using mathematical data reduction techniques, calculated coefficients for rational function models of average normal affinity,  $\pm 2$  standard deviations, and 95 per cent confidence limits. Average normal  $P_{50}$  was 27.10 torr, with a two-standard-deviation range of 25.85 to 28.35;  $P_{50}$ 's of the 95 per cent confidence limits were 26.69 and 27.53 torr. The affinity usually accepted as standard lay between or very near to the 95% confidence limits of normal throughout its range. It is concluded that the range of normal affinity is narrow and that, for most practical purposes, standard affinity adequately represents normal affinity. There should be little difficulty in distinguishing from normal the shifts that occur in certain disease conditions. (Key words: Blood, oxyhemoglobin dissociation curve; Oxygen, oxyhemoglobin dissociation curve.)

HEMOGLOBIN-OXYGEN AFFINITY is the continuous relationship between hemoglobin-oxygen saturation and oxygen tension ( $P_{O_2}$ ) under standardized conditions of pH (7.40),  $P_{CO_2}$  (40 torr), and temperature (37°C). Data collected by Severinghaus<sup>1</sup> and expressed in the form of an "oxyhemoglobin dissociation curve," a table, and a special slide rule are usually accepted as standard affinity and are assumed to represent normality. However,

the normality of this standard affinity has not been confirmed, and the statistical variance about normality has not been measured.

Recently developed techniques<sup>2</sup> facilitate the direct measurement of hemoglobin-oxygen affinity and permit estimation of statistical properties of the affinity of a group of blood samples. We measured the continuous hemoglobin-oxygen affinity of blood from 15 normal subjects and calculated the mean affinity, standard deviation, and 95 per cent confidence limits about the normal mean. These results were compared with standard affinity.

#### Method

None of the subjects smoked, had recently been subjected to high altitude, or had any condition expected to alter hemoglobin-oxygen affinity. Heparinized blood samples were drawn and immediately tonometered to  $P_{O_2}$  0.0557/0.000542-197506000-00020.pdf by guest on 10 April 2024 torr and  $P_{CO_2}$  40 torr. Oxygen uptake,  $P_{O_2}$ , and pH were then measured continuously to a  $P_{O_2}$  of approximately 300 torr on a Radiometer Corp. Model DCA-1 dissociation curve analyzer to which had been fitted a pH electrode. Final  $P_{O_2}$ ,  $P_{CO_2}$ , and pH were measured on a Radiometer Corp. Model BMS3 blood-gas analyzer.

Numerical processing methods previously described<sup>2</sup> were used to estimate  $P_{CO_2}$  and to reduce these measured data to standard conditions ( $P_{CO_2}$  40 torr and pH 7.40); to calculate the four coefficients each of the mathematical rational functions (eq. 1) representing average hemoglobin-oxygen affinity, plus and minus two standard deviations, and 95 per cent confidence limits; and to plot each of these functions as an oxyhemoglobin dissociation curve. The seven-coefficient rational function which Kehlman fitted to dissociation curve data<sup>3</sup> was used to calculate standard affinity. All calculations and plots were per-

\* Resident in Anesthesiology. Present address: Mercy Hospital, Redding, California 96001.

† Technician, Department of Medicine.

‡ Assistant Professor of Anesthesiology. Present address: Department of Anesthesiology, University of Tokyo, 7-Hongo, Bunkyo-Ku, Tokyo 113, Japan.

Received from the Department of Anesthesiology, University of California, San Diego, 225 W. Dickinson Street, San Diego, California 92107. Accepted for publication December 16, 1974. Supported in part by USPHS contract #PH6S-43-1332 for the University of California San Diego Myocardial Infarction Research Unit.

Address reprint requests to Dr. Yoder.

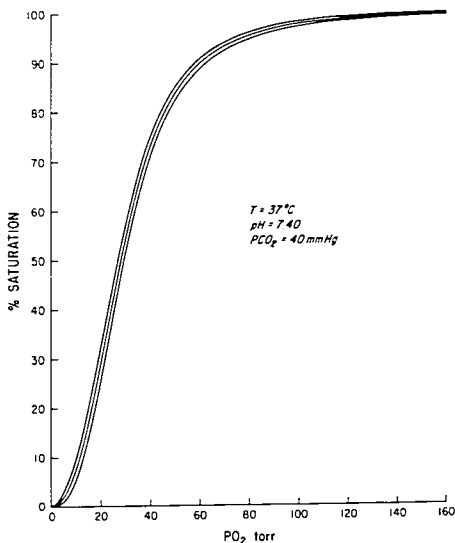

FIG. 1. Average normal hemoglobin-oxygen affinity and two-standard-deviation range.

formed on a Xerox Data Corporation Sigma-3 computer.

$$S = \frac{0.25A_1P + 0.5A_2P^2 + 0.75A_3P^3 + A_4P^4}{1 + A_1P + A_2P^2 + A_3P^3 + A_4P^4} \quad (1)$$

where

$S$  = saturation,

$A_i$  = coefficients

$P = P_{O_2}$ .

## Results

The oxygen tension at 50 per cent saturation ( $P_{50}$ ) for average normal hemoglobin-oxygen affinity was 27.10 torr, with a standard deviation of 0.625 torr. Thus, the two-standard-deviation range of average normal  $P_{50}$  was from 25.85 to 28.35. The continuous variance of average normal affinity is represented by a plot of its two-standard deviation range in figure 1.

The 95 per cent confidence limits of average normal affinity were 26.29 and 27.53 torr

at 50 per cent saturation, and are plotted along with standard affinity in figure 2. The maximum discrepancy between normal and standard affinities occurred at approximately 21 torr, which corresponded to 35 per cent saturation, where standard affinity was approximately 3.75 per cent saturation greater than average normal and 2.75 per cent saturation greater than the upper 95 per cent confidence limit.

Rational function coefficients for all of the measured curves are contained in Table 1.

## Discussion

To evaluate normality of the hemoglobin-oxygen affinity of a blood sample, it is necessary to know the range of normality, not just its mean value. Apparently the range of normality of hemoglobin-oxygen affinity is narrow. The  $P_{50}$ 's of approximately 95 per cent of normal specimens lie within a range of 2.0 torr. This may be illustrated in terms of oxygen delivery in a hypo-

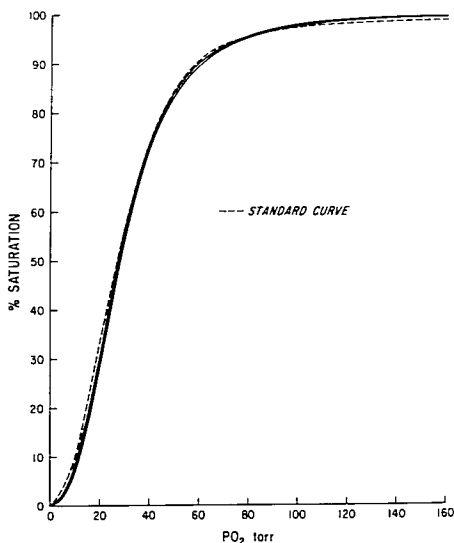

FIG. 2. Ninety-five per cent confidence limits of average normal hemoglobin-oxygen affinity with "standard" affinity superimposed.

thetical patient with normal affinity. Assuming arterial and venous blood  $P_{O_2}$ 's of 80 and 35 torr, respectively (and assuming that both arterial and venous blood  $P_{CO_2}$ 's and pH's are 40 torr and 7.40), the arteriovenous saturation difference, or oxygen exchange fraction, would amount to 28.81 per cent, on the average, and would range from 27.04 to 30.47 per cent. Thus, the range of variation in exchange fraction among hypothetical patients having normal affinity would be only 3.4 per cent, or 12 per cent of the exchange fraction itself. This is remarkable uniformity and suggests accurate homeostatic control.

Dramatic affinity changes have been observed in some disease states, suggesting that homeostatic mechanisms that are capable of maintaining close tolerances in health are either overcome or modified in disease. It is intriguing that pathologic variations in affinity often act toward compensation of decreased cardiac output or arterial hypoxemia by permitting release of oxygen at higher-than-normal tensions, thus preserving tissue oxygenation and tissue and venous blood  $P_{O_2}$ 's.

Present evidence points to organic phosphates, especially 2,3-diphosphoglycerate (DPG), as mediators of this homeostasis.<sup>1,5</sup>

TABLE 1. Coefficients of Rational Function Model of Hemoglobin-Oxygen Affinity

|                               | $A_1$                     | $A_2$                    | $A_3$                     | $A_4$                    |
|-------------------------------|---------------------------|--------------------------|---------------------------|--------------------------|
| Average normal                | $.697101 \times 10^{-2}$  | $.156576 \times 10^{-2}$ | $-.195468 \times 10^{-4}$ | $.238890 \times 10^{-3}$ |
| +1 standard deviation         | $-.100593 \times 10^{-1}$ | $.153636 \times 10^{-2}$ | $-.152770 \times 10^{-4}$ | $.159592 \times 10^{-3}$ |
| -1 standard deviation         | $.499686 \times 10^{-2}$  | $.219088 \times 10^{-2}$ | $-.333697 \times 10^{-4}$ | $.302752 \times 10^{-3}$ |
| +95 per cent confidence limit | $-.443996 \times 10^{-2}$ | $.166832 \times 10^{-2}$ | $-.190093 \times 10^{-4}$ | $.197852 \times 10^{-3}$ |
| -95 per cent confidence limit | $-.499618 \times 10^{-4}$ | $.189974 \times 10^{-2}$ | $-.250895 \times 10^{-4}$ | $.243786 \times 10^{-3}$ |

with increased levels of DPG being associated with decreased hemoglobin-oxygen affinity. A seemingly inconsistent finding that hemoglobin-oxygen affinity can decrease during a single passage through the coronary system, in the presence of angina, without accumulating additional intraerythrocytic DPG<sup>6</sup> is probably explained by the demonstration that erythrocytes normally carry an intracellular reserve of DPG on their cell walls. This intracellular reserve can be mobilized rapidly to combine with hemoglobin and thus lower hemoglobin-oxygen affinity.<sup>7</sup>

Whatever the mechanisms, it follows that neither standard nor normal affinities are adequate under these circumstances, and one result of this research might be to simplify the clinical method of determining the normality or abnormality of hemoglobin-oxygen affinity. It certainly is feasible, in the clinical environment, to measure hemoglobin concentration and standard blood-gas factors, including  $P_{O_2}$ ,  $P_{CO_2}$ , and pH. Relatively automatic and economical machines that measure oxyhemoglobin saturation of blood are now also available. The formulas and coefficients for the two-standard-deviation limits of affinity could be substituted into a blood-gas calculation program\* that estimates oxyhemoglobin saturation or blood oxygen content mathematically from blood-gas data and hemoglobin concentration, using a digital computer or programmable desk calculator. This would result in rapid estimation of the limits of normal saturation or oxygen content, compensated for the patient's ventilatory and biochemical state, and at the measured  $P_{O_2}$  of the blood sample. Comparison of measured saturation or oxygen content against these calculated limits would suggest the extent to which the pa-

tient's affinity varied from normal. Although requiring the use of a computational device, the technique should prove more expeditious than measurement of the  $P_{50}$  or of the entire affinity relationship by usual methods.

Since standard hemoglobin-oxygen affinity is, for the most part, statistically and physiologically indistinguishable from normal affinity, and since the range of normality is narrow, there would seem to be no objection to continued use of current tables, graphs, slide rules, and formulas for most purposes. Certainly there should be no difficulty in recognizing as abnormal gross affinity changes observed in some disease states.

### References

1. Severinghaus JW: Blood gas calculator. *J Appl Physiol* 21:1108-1116, 1966
2. Yoder RD, Seidenfeld A, Lopez WM, et al: Measurement of oxyhemoglobin dissociation curves with computational data reduction. *Comput Biomed Res* 6:14-26, 1973
3. Kelman GR: Digital computer subroutine for the conversion of oxygen tension into saturation. *J Appl Physiol* 21:1375-1376, 1966
4. Benesch R, Benesch RE: The effect of organic phosphates from the human erythrocyte on the allosteric properties of hemoglobin. *Biomed Biophys Res Commun* 26:162-176, 1967
5. Chanutin A, Curnish RH: Effect of organic and inorganic phosphates on the oxygen equilibrium of human erythrocytes. *Arch Biochem Biophys* 121:96-102, 1967
6. Schappell SD, Murray JA, Nasser MG, et al: Acute change in hemoglobin affinity for oxygen during angina pectoris. *N Engl J Med* 282:1219-1224, 1970
7. Oski FA, Miller LD, Delivoria-Papadopoulos M, et al: Oxygen affinity in red cells: Changes induced *in vivo* by propranolol. *Science* 175:1372-1373, 1972
8. Yoder RD, Peterson KL: Mathematical inference of blood gas data. *Comput Biol Med* 2:301-310, 1972
